# Supplementary material for: Valorization of Ferulic Acid from Agro-Industrial by-Products for Application in Agriculture
Source: MDPI journal article supplement (doi:10.3390/polym14142874), 2022-07-15
Supplement: s1 [file s1]

Supplementary material

# Valorization of Ferulic Acid from Agro-Industrial by-Products for Application in Agriculture

Maria Pilar Villanueva <sup>1</sup>, Claudio Gioia <sup>2,\*</sup>, Laura Sisti <sup>2</sup>, Laura Martí <sup>1</sup>, Raquel Llorens-Chiralt <sup>1</sup>, Steven Verstichel <sup>3</sup> and Annamaria Celli <sup>2</sup>

<sup>1</sup> AIMPLAS, Plastics Technological Centre, Gustave Eiffel, 4, 46980 Paterna Valencia, Spain; pvillanueva@aimplas.es (M.P.V.); lmarti@aimplas.es (L.M.); rllorens@aimplas.es (R.L.-C.)

<sup>2</sup> Department of Civil, Chemical, Environmental and Materials Engineering, University of Bologna, Via Terracini 28, 40131 Bologna, Italy; laura.sisti@unibo.it (L.S.); annamaria.celli@unibo.it (A.C.)

<sup>3</sup> Organic Waste Systems, Dok-Noord, 5, 9000 Gent, Belgium; steven.verstichel@ows.be

\* Correspondence: claudio.gioia2@unibo.it

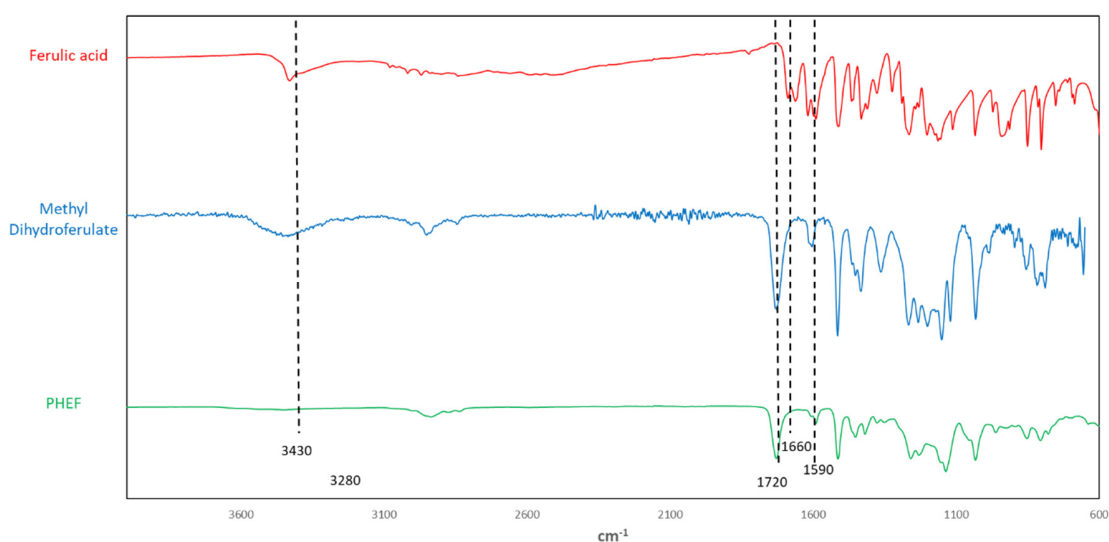

**Figure S1.** FT-IR of ferulic acid (FA), Methyl dihydroferulate, and Poly-dihydro (ethylene ferulate) (PHEF).

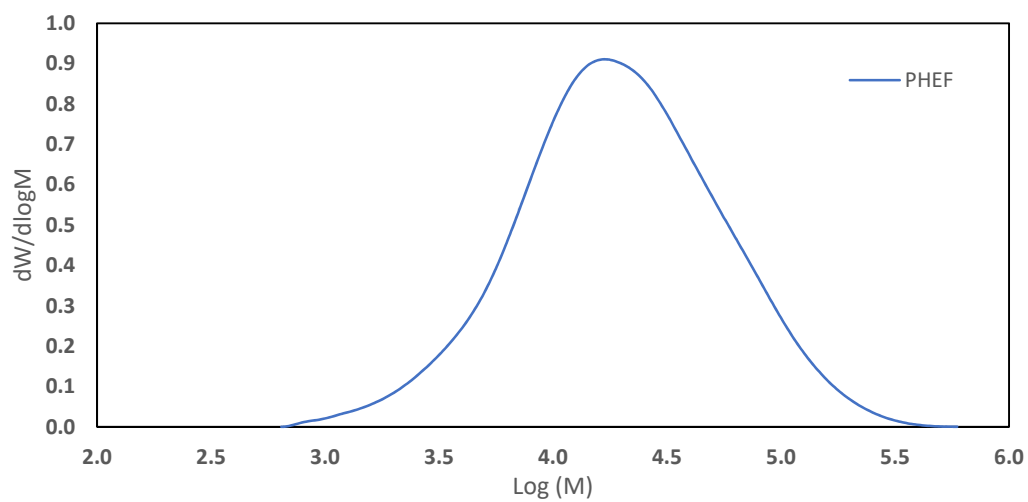

**Figure S2.** SEC analysis of PHEF

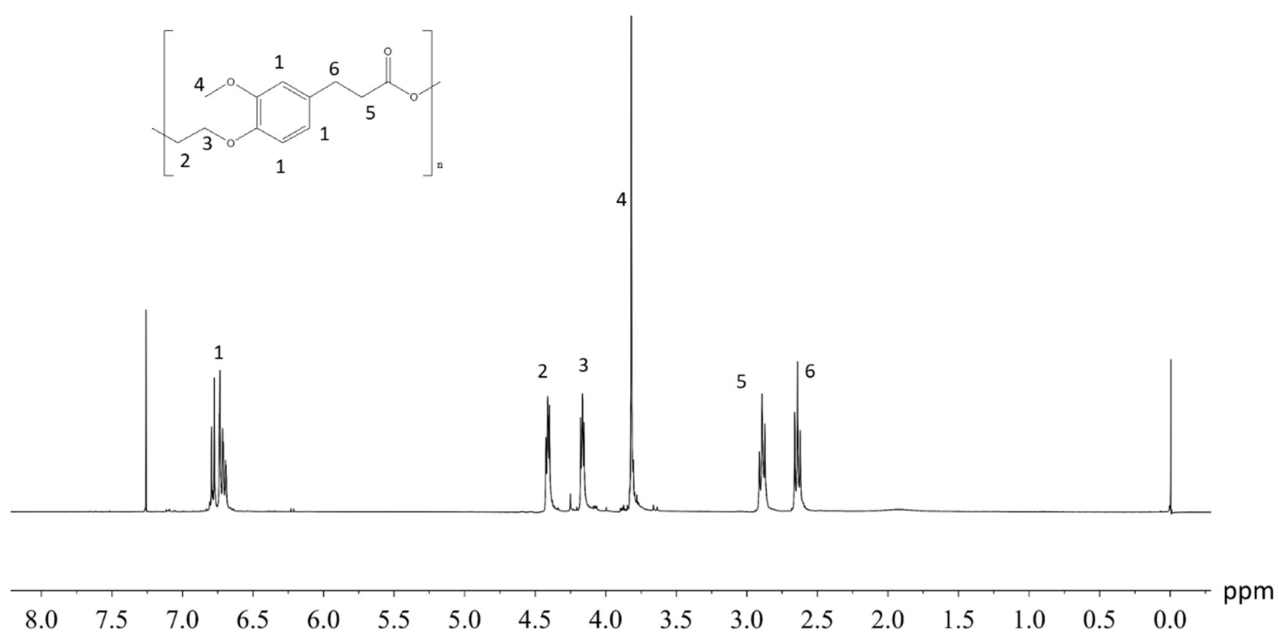

**Figure S3.**  $^1\text{H}$ -NMR of Poly-dihydro (ethylene ferulate) (PHEF).

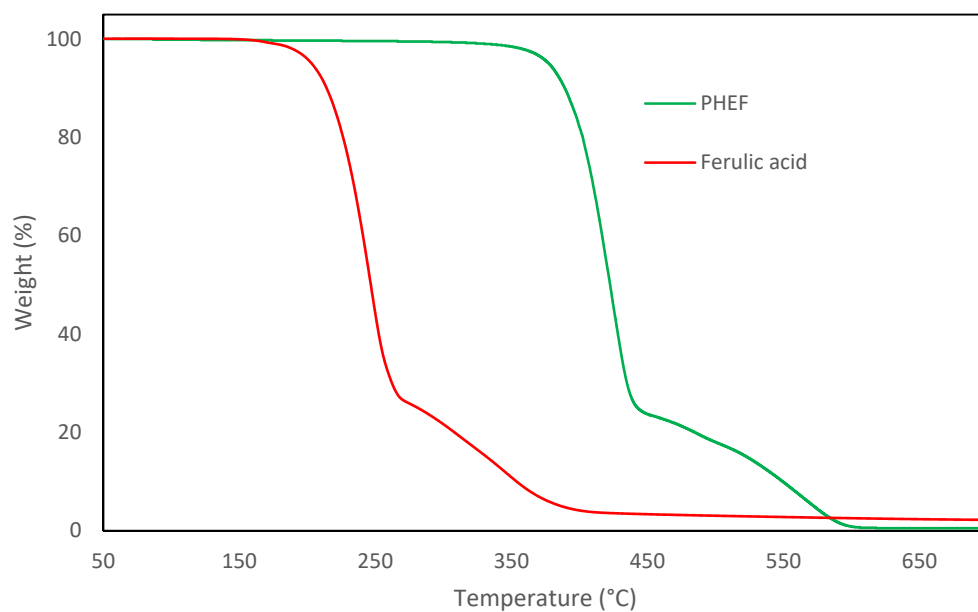

**Figure S4.** TGA of ferulic acid (FA), and Poly-dihydro (ethylene ferulate) (PHEF) under air atmosphere.

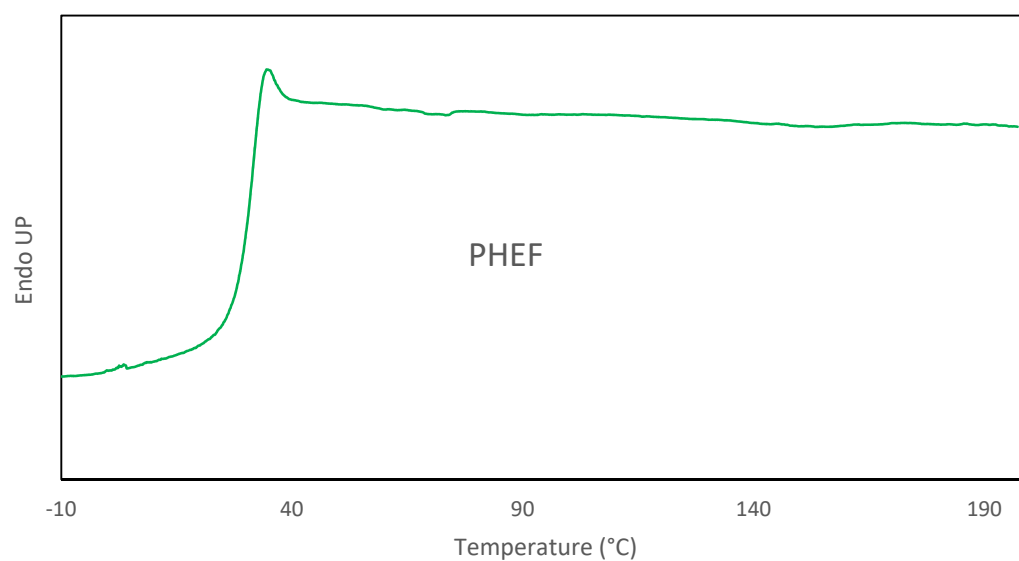

**Figure S5.** DSC analysis for Poly-dihydro (ethylene ferulate) (PHEF).

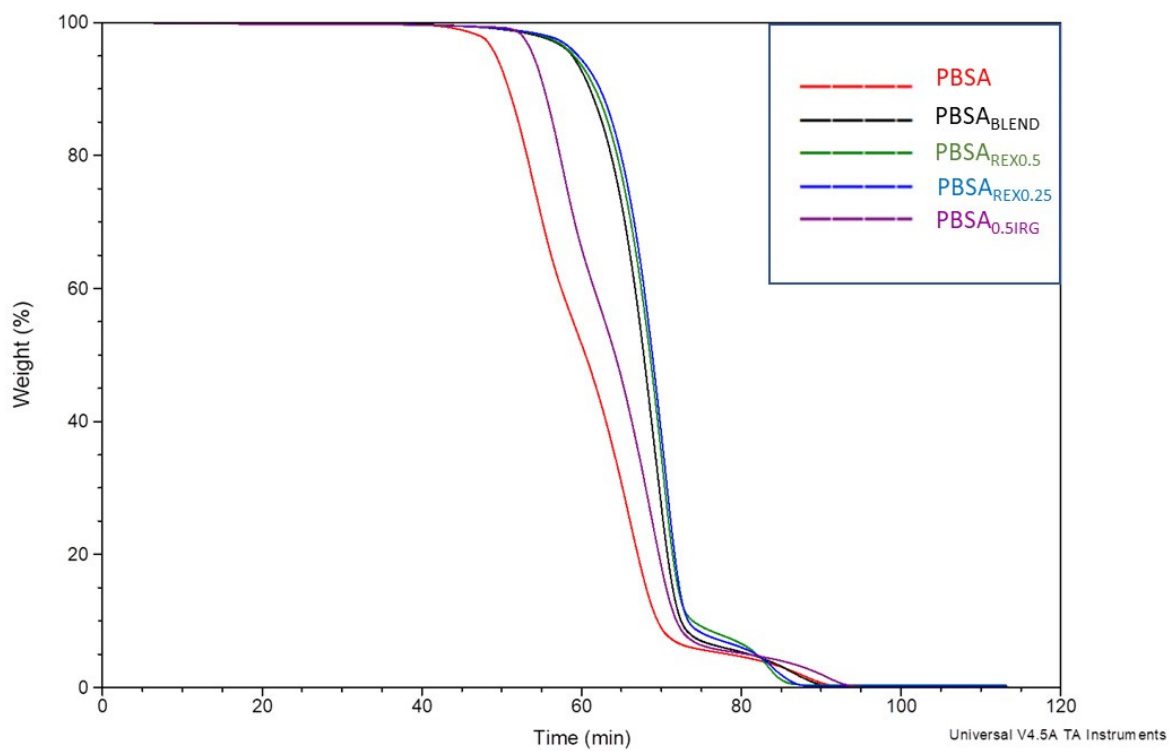

**Figure S6.** TGA curves of PBSA formulations: weight loss vs time.

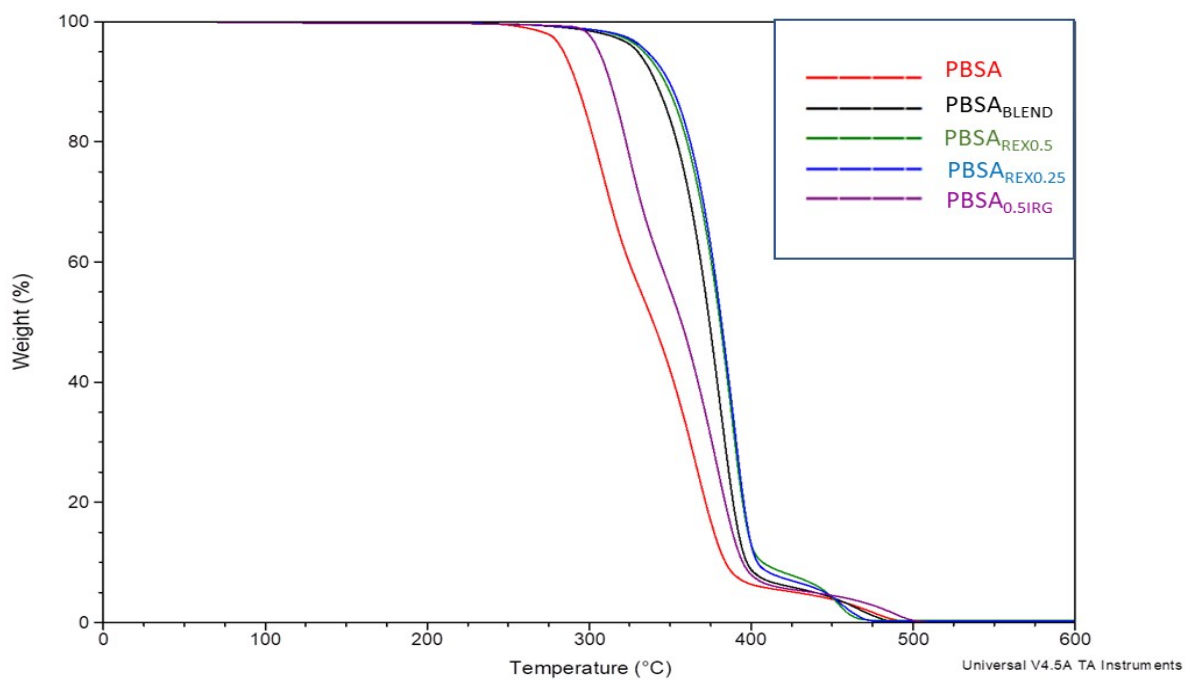

**Figure S7.** TGA curves of PBSA formulations: weight loss vs temperature.
